# Supplementary material for: A cyanometallate- and carbonate-bridged dysprosium chain complex with a pentadentate macrocyclic ligand: synthesis, structure, and magnetism
Source: Royal Society of Chemistry journal article supplement (doi:10.1039/d2nj00784c), 2022-01-01
Supplement: d2nj00784c1.pdf [file d2nj00784c1.pdf]

**Cyanometallate- and carbonate-bridged dysprosium chain complex with a pentadentate macrocyclic ligand: synthesis, structure, and magnetism**

Pengfei Tan,<sup>a</sup> Yimou Yang,<sup>a</sup> Wei Lv,<sup>b</sup> Rong Jing,<sup>a</sup> Huihui Cui,<sup>c</sup> Shao-Jun Zheng,<sup>a</sup> Lei Chen,<sup>\*a,b</sup> Aihua Yuan,<sup>\*a</sup> Xue-Tai Chen<sup>\*b</sup> and Yuyuan Zhao<sup>d</sup>

*<sup>a</sup>School of Environmental and Chemical Engineering, Jiangsu University of Science and Technology, Zhenjiang 212003, P. R. China.*

*<sup>b</sup>State Key Laboratory of Coordination Chemistry, School of Chemistry and Chemical Engineering, Nanjing University, Nanjing 210093, P. R. China.*

*<sup>c</sup>School of Chemistry and Chemical Engineering, Nantong University, Nantong 226019, P. R. China*

*<sup>d</sup>School of Medical Technology, Zhenjiang College, Zhenjiang 212003, P. R. China*

**Electronic Supplementary Information**

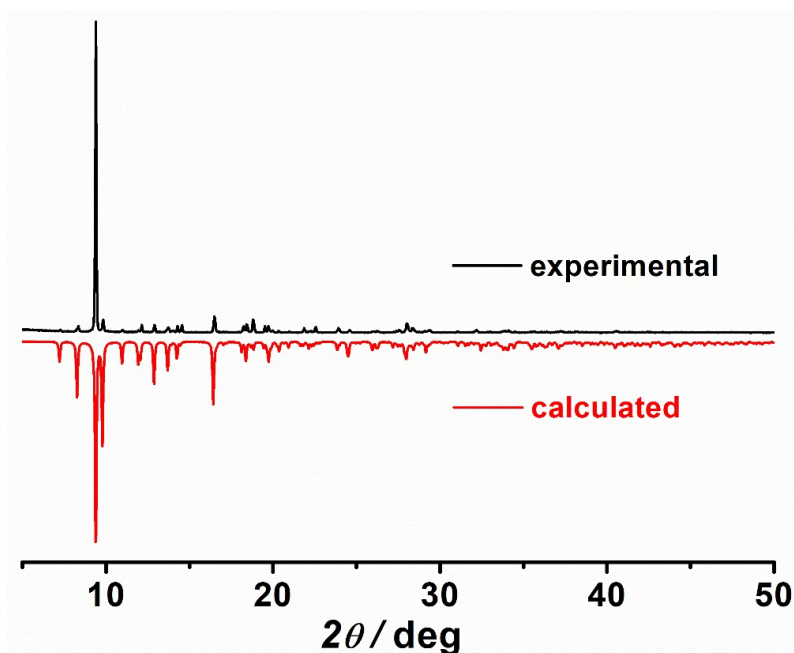

Fig. S1 PXRD pattern for complex 1.

Table S1. Crystal data and structure refinement for complex 1.

| 1                                                         |                                                                                  |
|-----------------------------------------------------------|----------------------------------------------------------------------------------|
| Molecular formula                                         | C <sub>39</sub> H <sub>51</sub> Dy <sub>2</sub> FeN <sub>16</sub> O <sub>4</sub> |
| CCDC no                                                   | 2151632                                                                          |
| Formula weight                                            | 1188.80                                                                          |
| Temperature                                               | 293(2) K                                                                         |
| Wavelength / Å                                            | 0.71073                                                                          |
| crystal system                                            | Triclinic                                                                        |
| Space group                                               | <i>P</i> -1                                                                      |
| <i>a</i> / Å                                              | 10.4443(3)                                                                       |
| <i>b</i> / Å                                              | 11.0826(3)                                                                       |
| <i>c</i> / Å                                              | 13.4916(4)                                                                       |
| $\alpha$ / deg                                            | 97.268(2)°                                                                       |
| $\beta$ / deg                                             | 111.991(2)°                                                                      |
| $\gamma$ / deg                                            | 99.703(2)°                                                                       |
| <i>V</i> / Å <sup>3</sup>                                 | 1396.26(7)                                                                       |
| <i>Z</i>                                                  | 1                                                                                |
| <i>D</i> <sub>calc</sub> , g/cm <sup>3</sup>              | 1.415                                                                            |
| $\mu$ / mm <sup>-1</sup>                                  | 2.952                                                                            |
| <i>F</i> (000)                                            | 588                                                                              |
| Goodness-of-fit on <i>F</i> <sup>2</sup>                  | 1.025                                                                            |
| Final R indices [ <i>I</i> > 2σ( <i>I</i> )] <sup>a</sup> | R <sub>1</sub> = 0.0334,<br>wR <sub>2</sub> = 0.0591                             |
| R indices (all data) <sup>a</sup>                         | R <sub>1</sub> = 0.0462,<br>wR <sub>2</sub> = 0.0615                             |

<sup>a</sup>wR<sub>2</sub> = [Σ[w(F<sub>o</sub><sup>2</sup> - F<sub>c</sub><sup>2</sup>)<sup>2</sup>]/Σ[w(F<sub>o</sub><sup>2</sup>)]<sup>1/2</sup>, R<sub>1</sub> = Σ||F<sub>o</sub>| - |F<sub>c</sub>||/Σ|F<sub>o</sub>|.

**Table S2.** Continuous Shape Measure (CShM) analysis for **1**. The lowest CShM value is highlighted.

|          | Octagon<br>( $D_{8h}$ ) | Heptagonal<br>pyramid<br>( $C_{7v}$ ) | Hexagonal<br>bipyramid<br>( $D_{6h}$ ) | Cube<br>( $O_h$ ) | Square<br>antiprism<br>( $D_{4d}$ ) | Triangular<br>dodecahedron<br>( $D_{2d}$ ) | Biaugmented<br>trigonal<br>prism<br>( $C_{2v}$ ) |
|----------|-------------------------|---------------------------------------|----------------------------------------|-------------------|-------------------------------------|--------------------------------------------|--------------------------------------------------|
| <b>1</b> | 33.332                  | 23.670                                | 12.952                                 | 10.052            | 4.477                               | 1.820                                      | 2.450                                            |

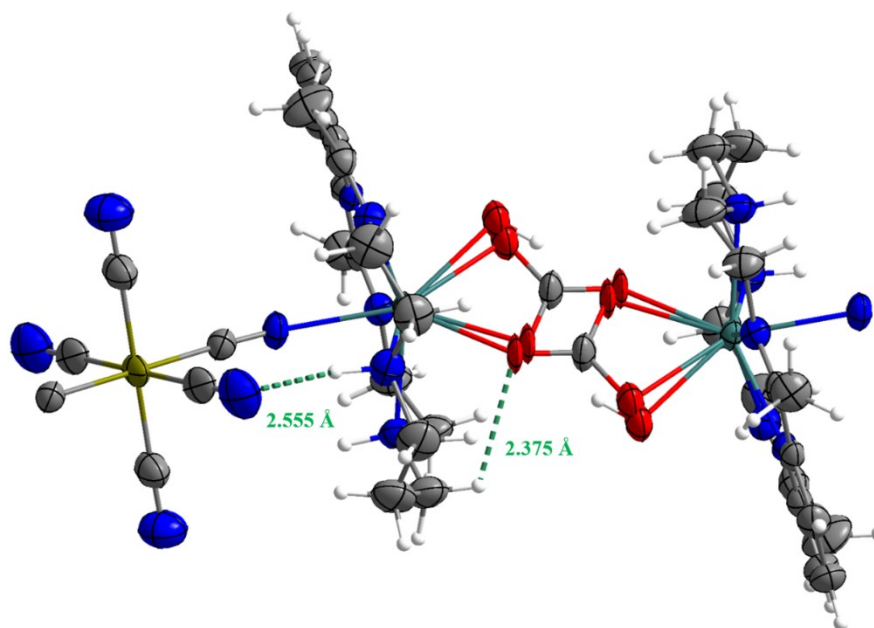

**Fig. S2** The intramolecular hydrogen bonds for complex **1**.

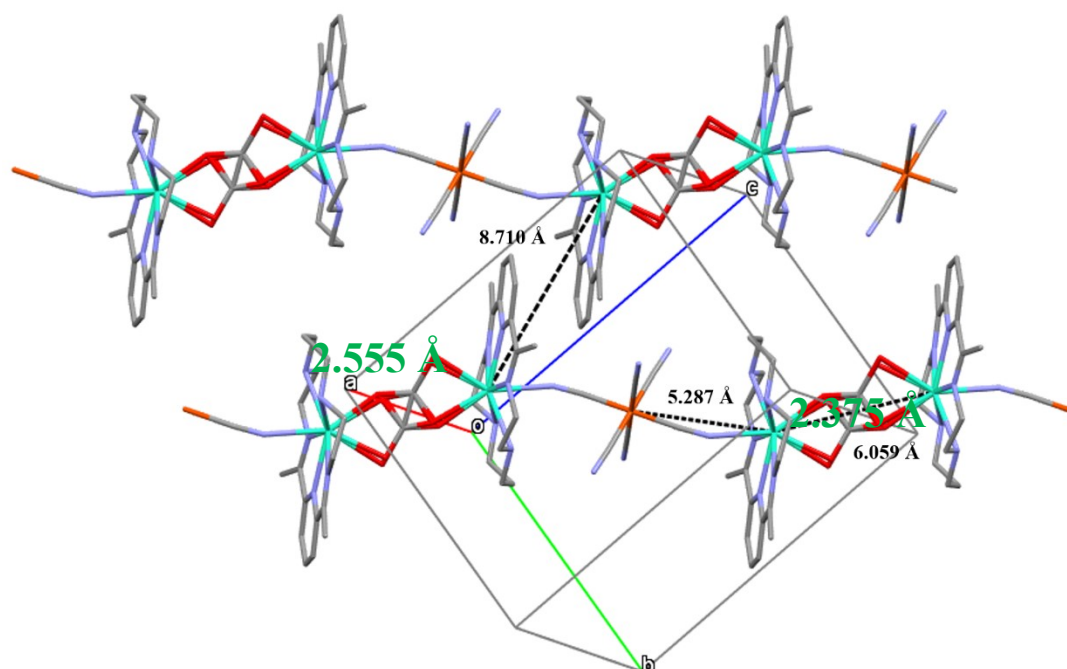

**Fig. S3** Packing diagram of complex **1**. Hydrogen atoms are omitted for clarity.

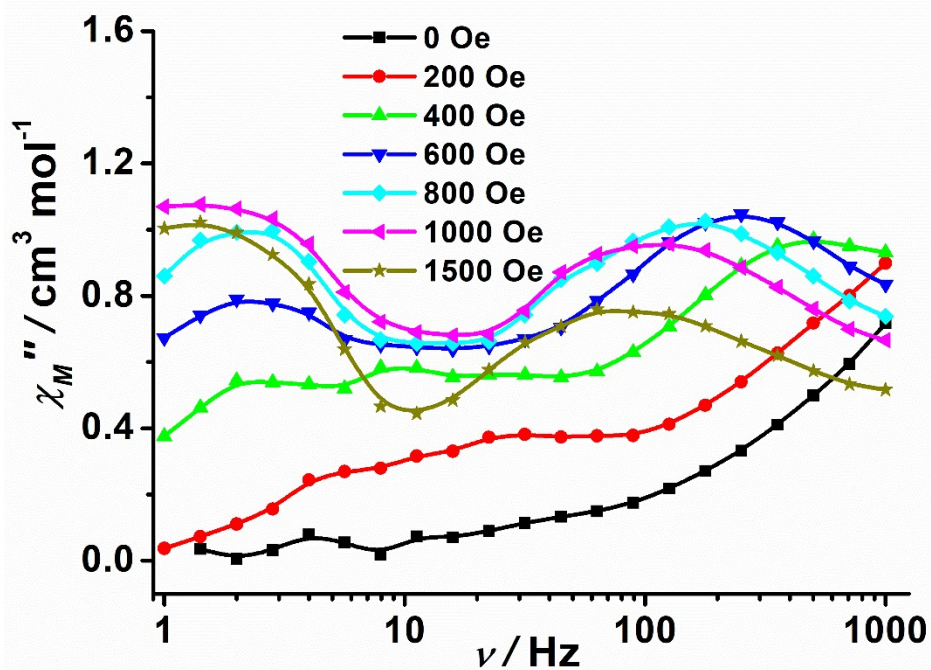

**Fig. S4** Frequency dependence of out-of-phase ( $\chi_M''$ ) components of ac magnetic susceptibility data for **1** at 1.8 K under the applied static field from 0 to 1500 Oe. The solid lines are for eye guide.

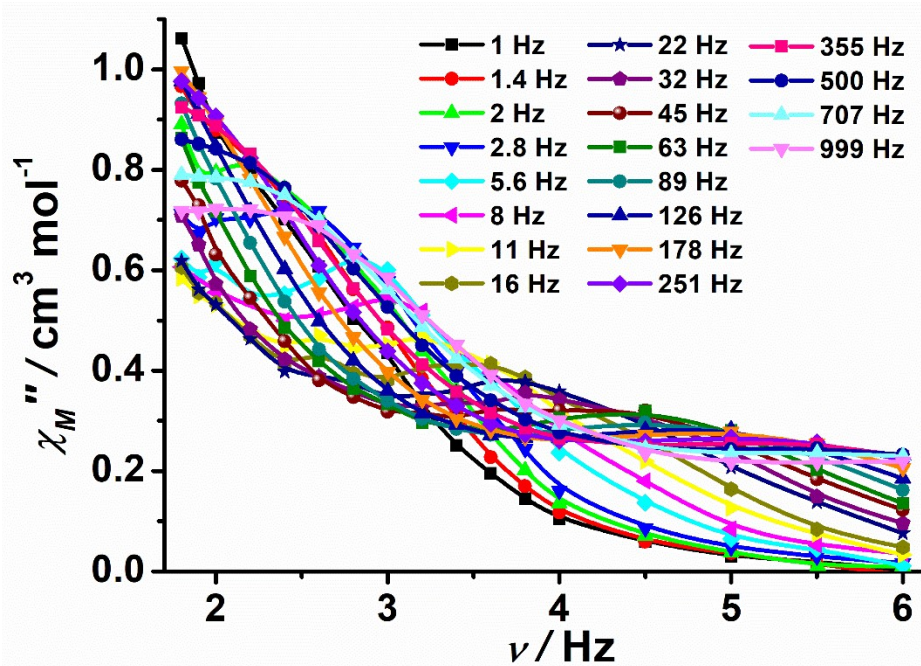

**Fig. S5** Variable-temperature out-of-phase ( $\chi_M''$ ) components of ac magnetic susceptibility data under a dc field of 800 Oe for **1**.
